# Supplementary material
Source: HighWire-hosted journal article supplement (https://jnm.snmjournals.org/highwire/filestream/108224/field_highwire_adjunct_files/0/262677_Supplemental_Data.pdf)
Supplement: 262677_Supplemental_Data.pdf [file 262677_Supplemental_Data.pdf]

## **Cerebral magnetic resonance tomography**

Patients received structural MRI on a 3 T scanner (Magnetom Prisma, Siemens Medical Solutions) with a 64-channel head coil using a protocol with the following sequences: sagittal 3D T1-weighted MPRAGE before and after contrast agent administration, sagittal 3D FLAIR SPACE, axial susceptibility weighted imaging (SWI), axial proton density + T2 double echo, dynamic susceptibility contrast (DSC) perfusion imaging and diffusion mesoscopic imaging (DMI) with 61 diffusion-encoding directions and b-factors of 1000 and 2000 s/mm<sup>2</sup>. Imaging was evaluated by a board-certified neuroradiologist (27 years of experience in neuroimaging). To assess atrophy voxel-based morphometry was performed (1).

**Supplemental Table 1: Demographics**

|                                                            | <b>Mean <math>\pm</math> SD [range] or N (%)</b><br><b>all patients</b> | <b>Mean (SD) [range] or N (%)</b><br><b>Subgroup of patients with</b><br><b><sup>18</sup>F-FDG PET</b> |
|------------------------------------------------------------|-------------------------------------------------------------------------|--------------------------------------------------------------------------------------------------------|
| Sex male/female                                            | 11 (36%) / 20 (64%)                                                     | 5 (36%) / 9 (64%)                                                                                      |
| Age (years)                                                | 53.6 $\pm$ 12.0 [24 – 75]                                               | 56.3 $\pm$ 7.2 [42 - 73]                                                                               |
| Years of education                                         | 13.6 $\pm$ 2.6 [8 - 18]                                                 | 13.2 $\pm$ 3.0 [8 - 18]                                                                                |
| $\Delta$ positive PCR - examination<br>(days)              | 202.3 $\pm$ 57.5 [90 – 316]                                             | 185.0 $\pm$ 52.9 [107 - 254]                                                                           |
| $\Delta$ positive PCR - <sup>18</sup> F-FDG-<br>PET (days) |                                                                         | 198.0 $\pm$ 63.5 [106 - 314]                                                                           |

**Supplemental Table 2: Clinical Characteristics**

|                                                    | <b>N (%)</b><br><b>all patients</b> | <b>N (%)</b><br><b>Subgroup of patients</b><br><b>with <sup>18</sup>F-FDG PET</b> |
|----------------------------------------------------|-------------------------------------|-----------------------------------------------------------------------------------|
| <b>Disease severity score<sup>1</sup></b>          |                                     |                                                                                   |
| 1                                                  | 9 (29%)                             | 3 (21%)                                                                           |
| 2                                                  | 12 (39%)                            | 6 (43%)                                                                           |
| 3                                                  | 6 (19%)                             | 2 (14%)                                                                           |
| 4                                                  | 4 (13%)                             | 3 (21%)                                                                           |
| <b>Degree of actual disability<sup>2</sup></b>     |                                     |                                                                                   |
| 0                                                  | 0 (0%)                              | 0 (0%)                                                                            |
| 1                                                  | 19 (61%)                            | 7 (50%)                                                                           |
| 2                                                  | 3 (10%)                             | 1 (7%)                                                                            |
| 3                                                  | 9 (29%)                             | 6 (43%)                                                                           |
| <b>Neurological symptoms during acute COVID-19</b> |                                     |                                                                                   |
| Disturbed olfaction                                | 22 (71%)                            | 11 (79%)                                                                          |
| Disturbed gust                                     | 26 (84%)                            | 11 (79%)                                                                          |
| Headache                                           | 11 (35%)                            | 6 (43%)                                                                           |
| Vertigo                                            | 9 (29%)                             | 3 (21%)                                                                           |
| Transient confusion                                | 7 (23%)                             | 3 (21%)                                                                           |
| <b>Actual neurological symptoms</b>                |                                     |                                                                                   |
| Poor attention                                     | 31 (100%)                           | 14 (100%)                                                                         |
| Memory impairment                                  | 31 (100%)                           | 14 (100%)                                                                         |

|                                                                                                                                                                                                                                                                                                                                                                                                        |           |           |
|--------------------------------------------------------------------------------------------------------------------------------------------------------------------------------------------------------------------------------------------------------------------------------------------------------------------------------------------------------------------------------------------------------|-----------|-----------|
| Impaired multi-tasking                                                                                                                                                                                                                                                                                                                                                                                 | 31 (100%) | 14 (100%) |
| Word finding difficulties                                                                                                                                                                                                                                                                                                                                                                              | 27 (87%)  | 12 (86%)  |
| Fatigue                                                                                                                                                                                                                                                                                                                                                                                                | 24 (77%)  | 11 (77%)  |
| <b>Pre-existing conditions</b>                                                                                                                                                                                                                                                                                                                                                                         |           |           |
| Hypertension                                                                                                                                                                                                                                                                                                                                                                                           | 7 (23%)   | 6 (43%)   |
| Diabetes mellitus                                                                                                                                                                                                                                                                                                                                                                                      | 2 (6%)    | 1 (7%)    |
| Renal insufficiency                                                                                                                                                                                                                                                                                                                                                                                    | 3 (10%)   | 2 (14%)   |
| Malignancy                                                                                                                                                                                                                                                                                                                                                                                             | 1 (3%)    | 1 (7%)    |
| Migraine                                                                                                                                                                                                                                                                                                                                                                                               | 5 (16%)   | 3 (21%)   |
| Depression                                                                                                                                                                                                                                                                                                                                                                                             | 3 (10%)   | 2 (14%)   |
| <sup>1</sup> Disease severity score: (1) no pneumonia; (2) pneumonia, outpatient treatment; (3) pneumonia, inpatient treatment; (4) ARDS, endotracheal ventilation at ICU<br><sup>2</sup> Degree of actual disability: (0) no relevant restrictions; (1) relevant restrictions but able to work; (2) reduction of work quota necessary; (3) inability to work and restriction of daily life activities |           |           |

### Supplemental Table 3: Neurocognitive test battery

| Domain and corresponding single tests                           | All patients      |                 | Subgroup of patients with <sup>18</sup> F-FDG PET |                 |
|-----------------------------------------------------------------|-------------------|-----------------|---------------------------------------------------|-----------------|
|                                                                 | Mean z-score ± SD | N (%) ≤ -1.5 SD | Mean z-score ± SD                                 | N (%) ≤ -1.5 SD |
| Verbal Memory                                                   | -0.13 ± 0.82      | 2 (6.5 %)       | 0.04 ± 0.73                                       | 0               |
| Hopkins Verbal Learning Test revised (HVLTR): learning (Scores) | -0.10 ± 0.84      | 3 (10 %)        | 0.149 ± 0.88                                      | 1 (7 %)         |
| HVLTR: del. Recall (Scores)                                     | -0.41 ± 1.11      | 7 (23 %)        | -0.31 ± 1.02                                      | 3 (21 %)        |
| HVLTR: recognition (Scores)                                     | 0.11 ± 0.99       | 4 (13 %)        | 0.26 ± 0.88                                       | 1 (7 %)         |
| Visual Memory                                                   | -0.35 ± 1.14      | 7 (22.5 %)      | -0.11 ± 0.88                                      | 1 (7.2 %)       |
| Brief Visual Memory Test (BVMT): learning (Scores)              | -0.41 ± 1.31      | 7 (23 %)        | -0.09 ± 1.20                                      | 2 (14 %)        |
| BVMT: del. Recall (Scores)                                      | 0.37 ± 1.22       | 4 (13 %)        | 0.21 ± 1.04                                       | 1 (7 %)         |
| BVMT: recognition (Scores)                                      | -0.60 ± 1.39      | 8 (26 %)        | -0.45 ± 1.28                                      | 2 (14 %)        |
| Processing Speed                                                | 0.48 ± 0.90       | 1 (3.2 %)       | 0.60 ± 1.06                                       | 1 (7.2 %)       |
| Color-Word Interference reading (Time (s))                      | 0.48 ± 0.95       | 1 (3 %)         | 0.43 ± 1.22                                       | 1 (7 %)         |
| Color-Word Interference: naming (Time (s))                      | 0.75 ± 1.08       | 2 (6 %)         | 0.90 ± 1.16                                       | 1 (7 %)         |

|                                                     |              |           |              |         |
|-----------------------------------------------------|--------------|-----------|--------------|---------|
| Symbol-Digits-Modalities Test<br>(Time (s))         | 0.20 ± 1.21  | 2 (6 %)   | 0.47 (1.28)  | 1 (7 %) |
| Attention                                           | 0.85 ± 0.98  | 0 (0.0 %) | 1.08 ± 1.05  | 0       |
| Trail Making Test A (Time (s))                      | 1.28 ± 1.75  | 3 (10 %)  | 1.96 ± 1.62  | 0       |
| Digit Span forward (Scores)                         | 0.42 ± 1.04  | 0 (0.0 %) | 0.22 ± 1.01  | 0       |
| Executive function                                  | 0.32 ± 0.74  | 0 (0.0 %) | 0.41 ± 0.75  | 0       |
| Digit Span backward (Scores)                        | 0.17 ± 1.61  | 0 (0.0 %) | 0.54 ± 2.16  | 0       |
| Semantic fluency: animals<br>(semantic) (Scores)    | 0.00 ± 0.91  | 2 (6 %)   | -0.29 ± 0.65 | 0       |
| Phonemic fluency: S-words<br>(phonemic) (Scores)    | -0.09 ± 1.11 | 2 (6 %)   | 0.21 ± 0.91  | 1 (7 %) |
| Color-Word Interference:<br>interference (Time (s)) | 0.51 ± 0.74  | 0 (0.0 %) | 0.59 ± 0.80  | 0       |
| Trail Making Test B (Time (s))                      | 1.03 ± 1.26  | 0 (0.0 %) | 1.40 ± 1.29  | 0       |
| Composite Score                                     | 0.20 ± 0.71  | 1 (3.2 %) | 0.36 ± 0.68  | 0       |

**Supplemental Table 4: Other tests**

|                                                                                   | <b>Mean score<br/>± SD<br/>[range]</b> | <b>N (%)<br/>below<br/>critical<br/>cutoff</b> | <b>Mean score<br/>± SD<br/>[range]</b> | <b>N (%)<br/>beyond<br/>critical<br/>cutoff</b> |
|-----------------------------------------------------------------------------------|----------------------------------------|------------------------------------------------|----------------------------------------|-------------------------------------------------|
| Montreal Cognitive Assessment (MoCA) (norm: ≥ 26)                                 | 26.55 ± 2.19<br>[2 - 30]               | 9 (29 %)                                       | 26.80 ± 2.04<br>[24 - 30]              | 4 (29 %)                                        |
| Würzburg Fatigue Inventory in Multiple Sclerosis: sum score (WEIMuS) (norm: ≤ 33) | 39.77 ± 12.33<br>[16 - 65]             | 19 (61 %)                                      | 39.90 ± 13.00<br>[16 - 61]             | 8 (57 %)                                        |
| WEIMuS: cognitive fatigue (norm: ≤ 17)                                            | 21.23 ± 7.17<br>[6 - 35]               | 21 (67 %)                                      | 20.60 ± 8.03<br>[6 - 33]               | 9 (64 %)                                        |
| WEIMuS: physical fatigue (norm: ≤ 16)                                             | 18.47 ± 6.25<br>[6 - 30]               | 13 (42 %)                                      | 19.20 ± 5.78<br>[10 - 28]              | 7 (50 %)                                        |
| Geriatric Depression Scale (GDS) (norm: ≤ 7)                                      | 3.94 ± 2.60<br>[0 - 10]                | 4 (13 %)                                       | 3.36 ± 2.24<br>[1 - 8]                 | 2 (14 %)                                        |
